# Supplementary material
Source: PubMed Central journal article supplement (PMC7359900)
Supplement: str-publish-ahead-of-print-10.1161.strokeaha.120.031208-s001.pdf [file str-publish-ahead-of-print-10.1161.strokeaha.120.031208-s001.pdf]

# SUPPLEMENTAL MATERIAL.

**Characteristics and outcomes in patients with COVID-19 and acute ischemic stroke**

- I. **Supplementary methods**
- II. **Supplementary tables**

## I. Supplementary methods

### Statistical analysis

In the descriptive part of our study, we expressed continuous variables as mean values  $\pm$  standard deviation or median and inter-quartile range (25<sup>th</sup> to 75<sup>th</sup> percentile). Accordingly, nominal variables are presented as absolute numbers and percentages. We used histograms and plotted kernel density estimates to illustrate the distribution of stroke severity scale in the two registries (the Global COVID-19 Stroke Registry and the Acute STroke Registry and Analysis of Lausanne (ASTRAL) Registry).

Subsequently, we employed a non-parsimonious multivariable probit regression model and we calculated propensity scores for the conditional probability of classification (COVID-19 Stroke Registry versus ASTRAL Registry) in 174 patients with COVID-19 and 5,684 stroke patients who suffered an ischemic stroke from 2013 to 2019 (i.e. the ASTRAL registry). Baseline characteristics (age and gender), previous history of ischemic stroke, risk factors and co-morbidities (smoking, diabetes mellitus, hypertension, hyperlipidemia, atrial fibrillation, heart failure, coronary artery disease, obesity and active cancer) were included in the final model for calculating the propensity score for each subject. A 1:1 matching algorithm of the nearest neighbor with no replacement was used with a caliper of 0.01 (equal to  $0.2 \times$  standard deviation of the propensity score). For assessment of differences in stroke outcomes between the two Registries, a second propensity matching was performed with similar specifications plus additional control for the different type of interventions administered. Covariate balance between matched patients of the two Registries was adjudicated for each variable by i) Student's T-Tests for equality of means in the two samples, ii) the reduction in the standardized percentage bias (difference of the sample means in the matched and non-matched sub-samples as a percentage of the square root of the average of the sample variances) and iii) excluding that the ratio of the variance of the residuals orthogonal to the linear index of the propensity score in the matched group over the non-matched group exceeds the 0.5 to 2 range. We also calculated measures of overall covariate balance as follows: i) median overall bias before and after matching ii) P-values of the likelihood-ratio test of the joint insignificance of all the covariates before and after matching and iii) Rubin's R as the ratio of matched to non-matched variances of the propensity score index and testing if R values exceed the range 0.5 to 2.

In the matched population, we used the non-parametric Wilcoxon signed-rank test to compare continuous outcomes between patients with COVID-19 and subjects from the ASTRAL registry. For assessing differences in dichotomous and ordinal outcomes, we implemented multi-level mixed effects logistic and ordinal logistic models which accounted for the correlation within each pair of matched patients. We derived 95% confidence intervals around the mean estimates by using robust standard errors (i.e. Huber/White/sandwich estimator). We confirmed the direction and the significance of our findings with fixed-effects conditional logistic models and ordinal regression models with robust standard errors for clustering of observations. Finally, we performed a sensitivity analysis for potential hidden bias in our matched database by calculating Rosenbaum bounds for average treatment effect on the treated in the presence of unobserved heterogeneity between matched patients.

This analysis indicated that our results showing increased mortality and worse Rankin score in COVID-19 were robust to unobserved covariates that would increase the odds of a patient's conditional classification by up to 130% and 45% respectively while being unrelated to the selected propensity model.

We used data from all patients with COVID-19 and acute stroke recruited consecutively from participating centres between January 2020 and May 2020; respectively, we utilized the full ASTRAL database in the context of propensity score matching. Therefore, no formal power calculations were performed. All tests were two-tailed. We deemed statistical significance at  $p=0.05$ . Statistical analysis was conducted with STATA 13, College Station, Texas 77845 USA.

## II. Supplementary Tables

| <b>Supplementary Table I. Descriptive characteristics of our study population</b> |                               |                         |
|-----------------------------------------------------------------------------------|-------------------------------|-------------------------|
| <b>Variable</b>                                                                   | <b>Available observations</b> | <b>Summary estimate</b> |
| <b>Demographics</b>                                                               |                               |                         |
| Total N, n                                                                        | 174                           |                         |
| Centres/Countries, n                                                              | 174                           | 28/16                   |
| Age, mean±SD [years]                                                              | 174                           | 71.2 (12.3)             |
| Gender, n (%) [males]                                                             | 174                           | 108 (62.07)             |
| Previous stroke, n (%)                                                            | 174                           | 20 (11.49)              |
| <b>Risk factors</b>                                                               |                               |                         |
| Smoking, n (%)                                                                    | 174                           | 49 (28.16)              |
| Hypertension, n (%)                                                               | 174                           | 119 (68.39)             |
| Diabetes mellitus, n (%)                                                          | 174                           | 54 (31.03)              |
| Obesity, n (%)                                                                    | 174                           | 65 (37.36)              |
| Alcohol abuse, n (%)                                                              | 174                           | 14 (8.05)               |
| Atrial fibrillation, n (%)                                                        | 174                           | 41 (23.56)              |
| Coronary artery disease, n (%)                                                    | 174                           | 30 (17.24)              |
| Heart Failure, n (%)                                                              | 174                           | 20 (11.49)              |
| Peripheral artery disease, n (%)                                                  | 174                           | 17 (9.77)               |
| <b>Comorbidities</b>                                                              |                               |                         |
| Severe liver disease, n (%)                                                       | 174                           | 3 (1.72)                |
| Lung disease, n (%)                                                               | 174                           | 14 (8.05)               |
| Renal disease, n (%)                                                              | 174                           | 2 (1.15)                |
| Active cancer, n (%)                                                              | 174                           | 48 (27.59)              |
| <b>Pre-stroke medications</b>                                                     |                               |                         |
| Antiplatelet, n (%)                                                               | 174                           | 40 (22.99)              |
| Oral anticoagulants, n (%)                                                        | 174                           | 21 (12.07)              |
| Antihypertensive medication, n (%)                                                | 174                           | 105 (60.34)             |
| Statin, n (%)                                                                     | 174                           | 59 (33.91)              |
| <b>Stroke characteristics</b>                                                     |                               |                         |
| NIHSS, median (IQR)                                                               | 125                           | 10 (4-18)               |
| Arterial Territory, n (%)<br>[anterior/middle]                                    | 163                           | 103 (63.19)             |
| Weakness, n (%)                                                                   | 174                           | 118 (67.82)             |
| Sensory deficits, n (%)                                                           | 174                           | 73 (41.95)              |
| Aphasia, n (%)                                                                    | 174                           | 60 (34.48)              |
| Dysarthria, n (%)                                                                 | 174                           | 80 (45.98)              |
| Dysphagia, n (%)                                                                  | 174                           | 43 (24.71)              |
| Imbalance, n (%)                                                                  | 174                           | 44 (25.29)              |
| Impaired level of Consciousness, n (%)                                            | 174                           | 44 (25.29)              |
| Underlying cardiac rhythm, n (%)<br>[Atrial fibrillation]                         | 171                           | 39 (22.81)              |
| Laterality, n (%) [left]                                                          | 151                           | 59(39.07)               |
| Brain imaging, n (%) [CT or MRI]                                                  | 174                           | 152(87.35)              |

| <b>Stroke related treatment</b>                        |     |                           |
|--------------------------------------------------------|-----|---------------------------|
| Antiplatelets, n (%)                                   | 171 | 100 (58.48)               |
| Statins, n (%)                                         | 170 | 102 (60.00)               |
| Antihypertensives, n (%)                               | 170 | 109 (64.12)               |
| Anticoagulants, n (%)                                  | 169 | 33 (19.53)                |
| Intervention                                           | 173 |                           |
| <i>Thrombolysis, n (%)</i>                             |     | 22 (12.72)                |
| <i>Thrombolysis and thrombectomy, n (%)</i>            |     | 12 (6.94)                 |
| <i>Endovascular thrombectomy, n (%)</i>                |     | 9 (5.2)                   |
| <b>Stroke diagnostic work-up</b>                       |     |                           |
| Echocardiography performed, n (%)                      | 172 | 54 (31.40)                |
| Holter monitoring, n (%)                               | 167 | 16 (9.58)                 |
| Vascular imaging, n (%)                                | 174 | 125 (71.84)               |
| <b>Laboratory parameters at admission</b>              |     |                           |
| WBC, median (IQR) [count/ $\mu$ l]                     | 171 | 9,700 (7,300-13,110)      |
| Lymphocytes, median (IQR) [count/ $\mu$ l]             | 166 | 900 (540-1440)            |
| Lymphocytopenia, n (%)                                 | 166 | 91 (54.82)                |
| Platelets, median (IQR) [count/ $\mu$ l]               | 171 | 220,000 (159,000-303,000) |
| Thrombocytopenia, n (%)                                | 171 | 39 (22.81)                |
| Thrombocytosis, (n%)                                   | 171 | 7 (4.1%)                  |
| Hemoglobin, median (IQR) [mg/dl]                       | 171 | 12 (10.2-13.7)            |
| C-reactive protein, median (IQR) [mg/dl]               | 142 | 11.3 (2.42-28.3)          |
| Creatinine, median (IQR) [mg/dl]                       | 171 | 0.97 (0.788-1.39)         |
| <b>COVID-19 related characteristics</b>                |     |                           |
| Diagnosis with RT-PCR, n (%)                           | 174 | 167 (95.98)               |
| COVID-19 symptoms to stroke onset, median (IQR) [days] | 156 | 7 (2-15)                  |
| Fever, n (%)                                           | 174 | 96 (55.17)                |
| Cough, n (%)                                           | 174 | 93 (53.45)                |
| Dyspnoea, n (%)                                        | 174 | 76 (43.68)                |
| Taste impairment, n (%)                                | 174 | 15 (8.62)                 |
| Gastrointestinal, n (%)                                | 174 | 19 (10.92)                |
| Lung imaging, n (%) [Chest CT]                         | 174 | 112 (64.37)               |
| Lung opacities, n (%)                                  | 174 | 131 (75.29)               |
| Chloroquine, n (%)                                     | 172 | 65 (37.79)                |
| Azithromycin, n (%)                                    | 172 | 40 (23.26)                |
| Lopinavir, n (%)                                       | 172 | 14 (8.14)                 |
| Tocilizumab, n (%)                                     | 172 | 11 (6.40)                 |
| Anakinra, n (%)                                        | 171 | 0 (0.00)                  |
| Steroids, n (%)                                        | 171 | 44 (25.73)                |
| Plasma transfusion, n (%)                              | 171 | 2 (1.17)                  |
| Heparin, n (%)                                         | 170 | 115 (67.65)               |
| <b>Outcomes</b>                                        |     |                           |
| Oedema, n (%)                                          | 79  | 4 (5.06)                  |

|                                                                                                                                                                                                                                                                                              |     |             |
|----------------------------------------------------------------------------------------------------------------------------------------------------------------------------------------------------------------------------------------------------------------------------------------------|-----|-------------|
| Haemorrhagic transformation, n (%)                                                                                                                                                                                                                                                           | 162 | 22 (13.58)  |
| Craniectomy, n (%)                                                                                                                                                                                                                                                                           | 164 | 3 (1.83)    |
| Transfer to ICU, n (%)                                                                                                                                                                                                                                                                       | 174 | 40 (22.99)  |
| Intubation, n (%)                                                                                                                                                                                                                                                                            | 174 | 27 (15.5)   |
| Rankin Score, median (IQR)                                                                                                                                                                                                                                                                   | 125 | 4 (2-6)     |
| Survivor with severe functional deficit, n (%)                                                                                                                                                                                                                                               | 96  | 49 (51.0)   |
| In hospital death, n (%)                                                                                                                                                                                                                                                                     | 174 | 48 (27.59)  |
| COVID-19 related death, n (%)                                                                                                                                                                                                                                                                | 174 | 22 (12.64)  |
| In hospital death and/or severe functional deficit, n (%)                                                                                                                                                                                                                                    | 174 | 97 (55.75)  |
| Discharge from hospital, n (%)                                                                                                                                                                                                                                                               | 174 | 110 (63.22) |
| Abbreviations: COVID-19, Coronavirus disease 2019; CT, computed tomography; ICU, Intensive Care Unit; IQR: inter-quartile range; MRI, magnetic resonance imaging; NIHSS, The National Institutes of Health Stroke Scale; RT-PCR, real time polymerase chain reaction; SD, standard deviation |     |             |

**Supplementary Table II. Covariate balance after propensity matching in 179 patients with COVID-19 and 5,684 patients from the ASTRAL registry resulting in a total population of 328 subjects**

| Variable        | Status    | COVID-19 Stroke Registry | ASTRAL Registry | %bias | %reduction in bias | P-value |
|-----------------|-----------|--------------------------|-----------------|-------|--------------------|---------|
| Age             | Unmatched | 71.59                    | 71.4            | 1.2   |                    | 0.887   |
|                 | Matched   | 71.55                    | 72.6            | -8    | -58.4              | 0.45    |
| Gender          | Unmatched | 0.619                    | 0.551           | 13.7  |                    | 0.08    |
|                 | Matched   | 0.6                      | 0.618           | -3.7  | 73                 | 0.736   |
| Smoking         | Unmatched | 0.283                    | 0.231           | 12    |                    | 0.11    |
|                 | Matched   | 0.279                    | 0.255           | 5.5   | 53.6               | 0.62    |
| Previous Stroke | Unmatched | 0.116                    | 0.193           | -21.4 |                    | 0.011   |
|                 | Matched   | 0.121                    | 0.121           | 0     | 100                | 0.999   |
| Hypertension    | Unmatched | 0.682                    | 0.719           | -7.9  |                    | 0.296   |
|                 | Matched   | 0.673                    | 0.649           | 5.3   | 33.4               | 0.643   |
| Dyslipidemia    | Unmatched | 0.341                    | 0.28            | 13.1  |                    | 0.082   |
|                 | Matched   | 0.333                    | 0.321           | 2.6   | 80                 | 0.815   |
| DM              | Unmatched | 0.312                    | 0.191           | 28.1  |                    | <0.001  |
|                 | Matched   | 0.279                    | 0.224           | 12.7  | 54.9               | 0.255   |
| AF              | Unmatched | 0.231                    | 0.3             | -15.7 |                    | 0.051   |
|                 | Matched   | 0.242                    | 0.285           | -9.6  | 38.6               | 0.383   |
| CAD             | Unmatched | 0.173                    | 0.183           | -2.4  |                    | 0.76    |
|                 | Matched   | 0.176                    | 0.188           | -3.2  | -32.6              | 0.776   |
| HF              | Unmatched | 0.116                    | 0.166           | -14.5 |                    | 0.079   |
|                 | Matched   | 0.121                    | 0.146           | -7    | 51.8               | 0.519   |
| Obesity         | Unmatched | 0.375                    | 0.481           | -21.3 |                    | 0.007   |
|                 | Matched   | 0.382                    | 0.352           | 6.1   | 71.1               | 0.569   |
| Active cancer   | Unmatched | 0.278                    | 0.058           | 61.5  |                    | <0.001  |
|                 | Matched   | 0.242                    | 0.249           | -1.7  | 97.2               | 0.899   |
| Intervention    | Unmatched | 0.422                    | 0.561           | -16.4 |                    | 0.036   |
|                 | Matched   | 0.412                    | 0.497           | -10   | 39                 | 0.359   |
| Motor deficit   | Unmatched | 0.682                    | 0.776           | -21.3 |                    | 0.004   |
|                 | Matched   | 0.691                    | 0.667           | 5.5   | 74.3               | 0.638   |
| Dysarthria      | Unmatched | 0.457                    | 0.534           | -15.5 |                    | 0.045   |
|                 | Matched   | 0.455                    | 0.43            | 4.9   | 68.8               | 0.659   |
| Sensory deficit | Unmatched | 0.422                    | 0.484           | -12.4 |                    | 0.109   |
|                 | Matched   | 0.43                     | 0.388           | 8.5   | 31.5               | 0.435   |

**Overall covariate imbalance**

|           | Joint LR chi2 | P-value | Mean Bias | Median Bias | *Rubin's R | **%Variance |
|-----------|---------------|---------|-----------|-------------|------------|-------------|
| Unmatched | 129.24        | <0.001  | 17.4      | 15          | 2.4        | 50          |
| Matched   | 7.13          | 0.971   | 5.9       | 5.5         | 0.65       | 0           |

\* Rubin's R exceeding the range 0.5 to 2 denotes overall covariate imbalance

\*\* Indicates the percentage of all covariates orthogonal to the propensity score with variance ratios exceeding the range of 0.5 to 2

Abbreviations: ASTRAL, the Acute STroke Registry and Analysis of Lausanne; AF, atrial fibrillation; COVID-19, Coronavirus disease 2019; DM, diabetes mellitus; CAD, coronary artery disease; HF, heart failure; LR, likelihood ratio

**Supplementary Table III. Comparisons in ischemic stroke severity and outcomes between COVID-19 and ASTRAL registry patients**

| Endpoint                                            | Stroke severity/outcome scales |                 | Odds ratio (95% CI)    | P-value |
|-----------------------------------------------------|--------------------------------|-----------------|------------------------|---------|
|                                                     | COVID-19 Stroke Registry       | ASTRAL Registry | COVID-19 versus ASTRAL |         |
| NIHSS, median (IQR)                                 | 10 (4-18)                      | 6 (3-14)        |                        | 0.03    |
| Higher NIHSS score                                  |                                |                 | 1.69 (1.082-2.65)      | 0.021   |
| In hospital death                                   |                                |                 | 4.3 (2.22-8.30)        | <0.001  |
| Non-Covid-19 related death                          |                                |                 | 2.02 (1.01-4.04)       | 0.048   |
| Transfer to ICU                                     |                                |                 | 3.86 (1.85-8.04)       | <0.001  |
| Adverse functional outcome                          |                                |                 | 1.79 (1.01-3.14)       | 0.045   |
| Rankin score, median (IQR)                          | 4 (2-6)                        | 2 (1-4)         |                        | <0.001  |
| Higher Rankin Score                                 |                                |                 | 3.13 (2.02-4.85)       | <0.001  |
| In hospital death and/or adverse functional outcome |                                |                 | 1.63 (1.04-2.55)       | 0.033   |
| Haemorrhagic transformation                         |                                |                 | 1.05 (0.449-2.45)      | 0.911   |
| Brain oedema                                        |                                |                 | 2.11 (0.375-11.89)     | 0.396   |

P-values are derived from Wilcoxon signed rank tests for the NIHSS and the Rankin scale and multi-level mixed effects logistic or ordinal logistic models for dichotomous and ordinal outcomes. The ASTRAL registry is the reference category for provided odds ratios.

Abbreviations: ASTRAL, the Acute STroke Registry and Analysis of Lausanne; COVID-19, Coronavirus disease 2019; ICU, intensive care unit; IQR, inter-quartile range; NIHSS, The National Institutes of Health Stroke Scale



**Supplementary Table IV. Outcomes per intervention in the matched cohort of stroke patients with and without COVID-19**

|                                              | COVID-19 patients |                      |                                             | ASTRAL Registry |                      |                                            |
|----------------------------------------------|-------------------|----------------------|---------------------------------------------|-----------------|----------------------|--------------------------------------------|
|                                              | Overall, n        | In hospital death, n | Survivors with severe functional deficit, n | Overall, n      | In hospital death, n | Survivor with severe functional deficit, n |
| N with available information on intervention | 167               | 167                  | 81                                          | 167             | 167                  | 143                                        |
| No intervention                              | 126               | 34                   | 31                                          | 103             | 14                   | 31                                         |
| Thrombolysis                                 | 21                | 5                    | 7                                           | 46              | 3                    | 18                                         |
| Thrombolysis and thrombectomy                | 12                | 3                    | 8                                           | 12              | 0                    | 3                                          |
| Endovascular thrombectomy                    | 8                 | 5                    | 3                                           | 6               | 1                    | 2                                          |

| <b>Supplementary Table V. Recruiting centres and patients per centre of the Global COVID-19 Stroke Registry</b> |               |                            |             |                |                                                       |
|-----------------------------------------------------------------------------------------------------------------|---------------|----------------------------|-------------|----------------|-------------------------------------------------------|
| <b>Patient's Ascending number</b>                                                                               | <b>Centre</b> | <b>Patients per centre</b> | <b>City</b> | <b>Country</b> | <b>Is the hospital a COVID-19 reference hospital?</b> |
| 1                                                                                                               | 1             | <b>Patient 1</b>           | Lausanne    | Switzerland    | Yes                                                   |
| 2                                                                                                               | 1             | <b>Patient 2</b>           | Lausanne    | Switzerland    | Yes                                                   |
| 3                                                                                                               | 1             | <b>Patient 3</b>           | Lausanne    | Switzerland    | Yes                                                   |
| 4                                                                                                               | 1             | <b>Patient 4</b>           | Lausanne    | Switzerland    | Yes                                                   |
| 5                                                                                                               | 1             | <b>Patient 5</b>           | Lausanne    | Switzerland    | Yes                                                   |
| 6                                                                                                               | 1             | <b>Patient 6</b>           | Lausanne    | Switzerland    | Yes                                                   |
| 7                                                                                                               | 1             | <b>Patient 7</b>           | Lausanne    | Switzerland    | Yes                                                   |
| 8                                                                                                               | 2             | <b>Patient 1*</b>          | London      | England        |                                                       |
| 9                                                                                                               | 2             | <b>Patient 2*</b>          | London      | England        |                                                       |
| 10                                                                                                              | 2             | <b>Patient 3*</b>          | London      | England        |                                                       |
| 11                                                                                                              | 2             | <b>Patient 4*</b>          | London      | England        |                                                       |
| 12                                                                                                              | 2             | <b>Patient 5*</b>          | London      | England        |                                                       |
| 13                                                                                                              | 2             | <b>Patient 6*</b>          | London      | England        |                                                       |
| 14                                                                                                              | 3             | <b>Patient 1</b>           | Moedling    | Austria        | Yes                                                   |
| 15                                                                                                              | 3             | <b>Patient 2</b>           | Moedling    | Austria        | Yes                                                   |
| 16                                                                                                              | 3             | <b>Patient 3</b>           | Moedling    | Austria        | Yes                                                   |
| 17                                                                                                              | 3             | <b>Patient 4</b>           | Moedling    | Austria        | Yes                                                   |
| 18                                                                                                              | 4             | <b>Patient 1</b>           | Mexico City | Mexico         | Yes                                                   |
| 19                                                                                                              | 4             | <b>Patient 2</b>           | Mexico City | Mexico         | yes                                                   |
| 20                                                                                                              | 4             | <b>Patient 3</b>           | Mexico City | Mexico         | Yes                                                   |
| 21                                                                                                              | 5             | <b>Patient 1</b>           | Armenia     | Colombia       | Yes                                                   |
| 22                                                                                                              | 6             | <b>Patient 1</b>           | Paris       | France         | No                                                    |
| 23                                                                                                              | 6             | <b>Patient 2</b>           | Paris       | France         | No                                                    |
| 24                                                                                                              | 6             | <b>Patient 3</b>           | Paris       | France         | No                                                    |
| 25                                                                                                              | 6             | <b>Patient 4</b>           | Paris       | France         | No                                                    |
| 26                                                                                                              | 6             | <b>Patient 5</b>           | Paris       | France         | No                                                    |
| 27                                                                                                              | 6             | <b>Patient 6</b>           | Paris       | France         | No                                                    |
| 28                                                                                                              | 6             | <b>Patient 7</b>           | Paris       | France         | No                                                    |
| 29                                                                                                              | 6             | <b>Patient 8</b>           | Paris       | France         | No                                                    |
| 30                                                                                                              | 6             | <b>Patient 9</b>           | Paris       | France         | No                                                    |
| 31                                                                                                              | 6             | <b>Patient 10</b>          | Paris       | France         | No                                                    |
| 32                                                                                                              | 6             | <b>Patient 11</b>          | Paris       | France         | No                                                    |
| 33                                                                                                              | 7             | <b>Patient 1</b>           | Savona      | Italy          | Yes                                                   |
| 34                                                                                                              | 7             | <b>Patient 2</b>           | Savona      | Italy          | Yes                                                   |
| 35                                                                                                              | 7             | <b>Patient 3</b>           | Savona      | Italy          | Yes                                                   |
| 36                                                                                                              | 7             | <b>Patient 4</b>           | Savona      | Italy          | Yes                                                   |

|    |    |                   |            |         |     |
|----|----|-------------------|------------|---------|-----|
| 37 | 9  | <b>Patient 1</b>  | Copenhagen | Denmark | Yes |
| 38 | 9  | <b>Patient 2</b>  | Copenhagen | Denmark | Yes |
| 39 | 9  | <b>Patient 3</b>  | Copenhagen | Denmark | Yes |
| 40 | 9  | <b>Patient 4</b>  | Copenhagen | Denmark | Yes |
| 41 | 9  | <b>Patient 5</b>  | Copenhagen | Denmark | Yes |
| 42 | 9  | <b>Patient 6</b>  | Copenhagen | Denmark | Yes |
| 43 | 9  | <b>Patient 7</b>  | Copenhagen | Denmark | Yes |
| 44 | 9  | <b>Patient 8</b>  | Copenhagen | Denmark | Yes |
| 45 | 10 | <b>Patient 1</b>  | Madrid     | Spain   | Yes |
| 46 | 10 | <b>Patient 2</b>  | Madrid     | Spain   | Yes |
| 47 | 10 | <b>Patient 3</b>  | Madrid     | Spain   | Yes |
| 48 | 10 | <b>Patient 4</b>  | Madrid     | Spain   | Yes |
| 49 | 11 | <b>Patient 1</b>  | Copenhagen | Denmark | No  |
| 50 | 11 | <b>Patient 2</b>  | Copenhagen | Denmark | No  |
| 51 | 11 | <b>Patient 3</b>  | Copenhagen | Denmark | No  |
| 52 | 12 | <b>Patient 1</b>  | Wuhan      | China   | Yes |
| 53 | 12 | <b>Patient 2</b>  | Wuhan      | China   | Yes |
| 54 | 12 | <b>Patient 3</b>  | Wuhan      | China   | Yes |
| 55 | 12 | <b>Patient 4</b>  | Wuhan      | China   | Yes |
| 56 | 12 | <b>Patient 5</b>  | Wuhan      | China   | Yes |
| 57 | 12 | <b>Patient 6</b>  | Wuhan      | China   | Yes |
| 58 | 12 | <b>Patient 7</b>  | Wuhan      | China   | Yes |
| 59 | 12 | <b>Patient 8</b>  | Wuhan      | China   | Yes |
| 60 | 12 | <b>Patient 9</b>  | Wuhan      | China   | Yes |
| 61 | 12 | <b>Patient 10</b> | Wuhan      | China   | Yes |
| 62 | 12 | <b>Patient 11</b> | Wuhan      | China   | Yes |
| 63 | 12 | <b>Patient 12</b> | Wuhan      | China   | Yes |
| 64 | 12 | <b>Patient 13</b> | Wuhan      | China   | Yes |
| 65 | 12 | <b>Patient 14</b> | Wuhan      | China   | Yes |
| 66 | 12 | <b>Patient 15</b> | Wuhan      | China   | Yes |
| 67 | 12 | <b>Patient 16</b> | Wuhan      | China   | Yes |
| 68 | 12 | <b>Patient 17</b> | Wuhan      | China   | Yes |
| 69 | 12 | <b>Patient 18</b> | Wuhan      | China   | Yes |
| 70 | 12 | <b>Patient 19</b> | Wuhan      | China   | Yes |
| 71 | 12 | <b>Patient 20</b> | Wuhan      | China   | Yes |
| 72 | 12 | <b>Patient 21</b> | Wuhan      | China   | Yes |
| 73 | 12 | <b>Patient 22</b> | Wuhan      | China   | Yes |
| 74 | 12 | <b>Patient 23</b> | Wuhan      | China   | Yes |
| 75 | 12 | <b>Patient 24</b> | Wuhan      | China   | Yes |
| 76 | 12 | <b>Patient 25</b> | Wuhan      | China   | Yes |

|     |    |                   |               |         |     |
|-----|----|-------------------|---------------|---------|-----|
| 77  | 12 | <b>Patient 26</b> | Wuhan         | China   | Yes |
| 78  | 12 | <b>Patient 27</b> | Wuhan         | China   | Yes |
| 79  | 12 | <b>Patient 28</b> | Wuhan         | China   | Yes |
| 80  | 12 | <b>Patient 29</b> | Wuhan         | China   | Yes |
| 81  | 12 | <b>Patient 30</b> | Wuhan         | China   | Yes |
| 82  | 12 | <b>Patient 31</b> | Wuhan         | China   | Yes |
| 83  | 12 | <b>Patient 32</b> | Wuhan         | China   | Yes |
| 84  | 12 | <b>Patient 33</b> | Wuhan         | China   | Yes |
| 85  | 12 | <b>Patient 34</b> | Wuhan         | China   | Yes |
| 86  | 12 | <b>Patient 35</b> | Wuhan         | China   | Yes |
| 87  | 12 | <b>Patient 36</b> | Wuhan         | China   | Yes |
| 88  | 12 | <b>Patient 37</b> | Wuhan         | China   | Yes |
| 89  | 13 | <b>Patient 1</b>  | Bucharest     | Romania | No  |
| 90  | 13 | <b>Patient 2</b>  | Bucharest     | Romania | No  |
| 91  | 14 | <b>Patient 1</b>  | Mexico City   | Mexico  | Yes |
| 92  | 15 | <b>Patient 1</b>  | Barcelona     | Spain   | Yes |
| 93  | 15 | <b>Patient 2</b>  | Barcelona     | Spain   | Yes |
| 94  | 15 | <b>Patient 3</b>  | Barcelona     | Spain   | Yes |
| 95  | 15 | <b>Patient 4</b>  | Barcelona     | Spain   | Yes |
| 96  | 15 | <b>Patient 5</b>  | Barcelona     | Spain   | Yes |
| 97  | 16 | <b>Patient 1</b>  | Stockholm     | Sweden  | Yes |
| 98  | 16 | <b>Patient 2</b>  | Stockholm     | Sweden  | Yes |
| 99  | 16 | <b>Patient 3</b>  | Stockholm     | Sweden  | Yes |
| 100 | 16 | <b>Patient 4</b>  | Stockholm     | Sweden  | Yes |
| 101 | 16 | <b>Patient 5</b>  | Stockholm     | Sweden  | Yes |
| 102 | 17 | <b>Patient 1</b>  | Oslo/Akershus | Norway  | No  |
| 103 | 18 | <b>Patient 1</b>  | Vienna        | Austria | no  |
| 104 | 18 | <b>Patient 2</b>  | Vienna        | Austria | no  |
| 105 | 19 | <b>Patient 1</b>  | Helsinki      | Finland | yes |
| 106 | 20 | <b>Patient 1</b>  | Philadelphia  | USA     | Yes |
| 107 | 20 | <b>Patient 2</b>  | Philadelphia  | USA     | Yes |
| 108 | 20 | <b>Patient 3</b>  | Philadelphia  | USA     | Yes |
| 109 | 20 | <b>Patient 4</b>  | Philadelphia  | USA     | Yes |
| 110 | 20 | <b>Patient 5</b>  | Philadelphia  | USA     | Yes |
| 111 | 20 | <b>Patient 6</b>  | Philadelphia  | USA     | Yes |
| 112 | 21 | <b>Patient 1</b>  | Bucharest     | Romania | Yes |
| 113 | 21 | <b>Patient 2</b>  | Bucharest     | Romania | Yes |
| 114 | 21 | <b>Patient 3</b>  | Bucharest     | Romania | Yes |
| 115 | 21 | <b>Patient 4</b>  | Bucharest     | Romania | Yes |
| 116 | 21 | <b>Patient 5</b>  | Giurgiu       | Romania | Yes |

|     |    |                   |           |         |     |
|-----|----|-------------------|-----------|---------|-----|
| 117 | 21 | <b>Patient 6</b>  | Giurgiu   | Romania | Yes |
| 118 | 21 | <b>Patient 7</b>  | Bucharest | Romania | Yes |
| 119 | 21 | <b>Patient 8</b>  | Giurgiu   | Romania | Yes |
| 120 | 21 | <b>Patient 9</b>  | Bucharest | Romania | Yes |
| 121 | 21 | <b>Patient 10</b> | Bucharest | Romania | Yes |
| 122 | 22 | <b>Patient 1</b>  | Madrid    | Spain   | Yes |
| 123 | 22 | <b>Patient 2</b>  | Madrid    | Spain   | Yes |
| 124 | 22 | <b>Patient 3</b>  | Madrid    | Spain   | Yes |
| 125 | 22 | <b>Patient 4</b>  | Madrid    | Spain   | Yes |
| 126 | 22 | <b>Patient 5</b>  | Madrid    | Spain   | Yes |
| 127 | 22 | <b>Patient 6</b>  | Madrid    | Spain   | Yes |
| 128 | 22 | <b>Patient 7</b>  | Madrid    | Spain   | Yes |
| 129 | 22 | <b>Patient 8</b>  | Madrid    | Spain   | Yes |
| 130 | 22 | <b>Patient 9</b>  | Madrid    | Spain   | Yes |
| 131 | 22 | <b>Patient 10</b> | Madrid    | Spain   | Yes |
| 132 | 22 | <b>Patient 11</b> | Madrid    | Spain   | Yes |
| 133 | 22 | <b>Patient 12</b> | Madrid    | Spain   | Yes |
| 134 | 22 | <b>Patient 13</b> | Madrid    | Spain   | Yes |
| 135 | 22 | <b>Patient 14</b> | Madrid    | Spain   | Yes |
| 136 | 22 | <b>Patient 15</b> | Madrid    | Spain   | Yes |
| 137 | 23 | <b>Patient 1</b>  | Madrid    | Spain   | Yes |
| 138 | 23 | <b>Patient 2</b>  | Madrid    | Spain   | Yes |
| 139 | 23 | <b>Patient 3</b>  | Madrid    | Spain   | Yes |
| 140 | 23 | <b>Patient 4</b>  | Madrid    | Spain   | Yes |
| 141 | 23 | <b>Patient 5</b>  | Madrid    | Spain   | Yes |
| 142 | 23 | <b>Patient 6</b>  | Madrid    | Spain   | Yes |
| 143 | 23 | <b>Patient 7</b>  | Madrid    | Spain   | Yes |
| 144 | 23 | <b>Patient 8</b>  | Madrid    | Spain   | Yes |
| 145 | 23 | <b>Patient 9</b>  | Madrid    | Spain   | Yes |
| 146 | 23 | <b>Patient 10</b> | Madrid    | Spain   | Yes |
| 147 | 23 | <b>Patient 11</b> | Madrid    | Spain   | Yes |
| 148 | 23 | <b>Patient 12</b> | Madrid    | Spain   | Yes |
| 149 | 23 | <b>Patient 13</b> | Madrid    | Spain   | Yes |
| 150 | 23 | <b>Patient 14</b> | Madrid    | Spain   | Yes |
| 151 | 24 | <b>Patient 1</b>  | Madrid    | Spain   | Yes |
| 152 | 24 | <b>Patient 2</b>  | Madrid    | Spain   | Yes |
| 153 | 24 | <b>Patient 3</b>  | Madrid    | Spain   | Yes |
| 154 | 24 | <b>Patient 4</b>  | Madrid    | Spain   | Yes |
| 155 | 24 | <b>Patient 5</b>  | Madrid    | Spain   | Yes |
| 156 | 24 | <b>Patient 6</b>  | Madrid    | Spain   | Yes |

|     |    |                   |             |             |     |
|-----|----|-------------------|-------------|-------------|-----|
| 157 | 24 | <b>Patient 7</b>  | Madrid      | Spain       | Yes |
| 158 | 24 | <b>Patient 8</b>  | Madrid      | Spain       | Yes |
| 159 | 24 | <b>Patient 9</b>  | Madrid      | Spain       | Yes |
| 160 | 24 | <b>Patient 10</b> | Madrid      | Spain       | Yes |
| 161 | 24 | <b>Patient 11</b> | Madrid      | Spain       | Yes |
| 162 | 24 | <b>Patient 12</b> | Madrid      | Spain       | Yes |
| 163 | 24 | <b>Patient 13</b> | Madrid      | Spain       | Yes |
| 164 | 24 | <b>Patient 14</b> | Madrid      | Spain       | Yes |
| 165 | 24 | <b>Patient 15</b> | Madrid      | Spain       | Yes |
| 166 | 24 | <b>Patient 16</b> | Madrid      | Spain       | Yes |
| 167 | 24 | <b>Patient 17</b> | Madrid      | Spain       | Yes |
| 168 | 25 | <b>Patient 1</b>  | Athens      | Greece      | Yes |
| 169 | 26 | <b>Patient 1</b>  | Lugano      | Switzerland | No  |
| 170 | 26 | <b>Patient 2</b>  | Lugano      | Switzerland | No  |
| 171 | 27 | <b>Patient 1</b>  | Mexico City | Mexico      | No  |
| 172 | 27 | <b>Patient 2</b>  | Mexico City | Mexico      | No  |
| 173 | 28 | <b>Patient 1</b>  | Linz        | Austria     | Yes |
| 174 | 28 | <b>Patient 2</b>  | Linz        | Austria     | Yes |

\* Details about these patients were previously published (Beyrouti R., et al. Characteristics of ischaemic stroke associated with COVID-19. *J Neurol Neurosurg Psychiatry*. 2020 Apr 30. pii: jnnp-2020-323586. doi: 10.1136/jnnp-2020-323586)

Abbreviations: COVID-19, Coronavirus disease 2019
